# Supplementary material for: Promoting Evidence-Based Practice for Improved Occupational Safety and Health at Workplaces in Sweden. Report on a Practice-Based Research Network Approach
Source: MDPI journal article supplement (doi:10.3390/ijerph17155283), 2020-07-22
Supplement: s1 [file s1]

Appendix 1. An overview of main research studies performed in the PBRN-OSH setting.

|                                                                                                                                           | <b>Design</b>                                     | <b>Involved partners</b>                                       | <b>International Publications</b> |
|-------------------------------------------------------------------------------------------------------------------------------------------|---------------------------------------------------|----------------------------------------------------------------|-----------------------------------|
| The Stress Prevention At Work (SPA)-study                                                                                                 | RCT, Mixed methods                                | Primary Health care units and OH service at one county council | [1-3]                             |
| Problem solving intervention for CMD at work (PIA)-study                                                                                  | RCT, Mixed methods<br>Cost effectiveness          | OH-services on different locations in Sweden                   | [4,5]                             |
| Prevention of common mental disorders at the workplace” in schools The iSkol-study                                                        | RCT, Mixed methods<br>Implementation study design | Three municipalities in Sweden                                 | [6,7]                             |
| Bullying in academia and industry                                                                                                         | Cohort study<br>Mixed methods                     | Labour union for managers (Ledarna, Unionen)                   | [8,9]                             |
| Effectiveness of yoga for employees with back pain (RYS)-study                                                                            | RCT<br>Cost effectiveness                         | OH-services, fitness center, Yoga center                       | [10,11]                           |
| Measuring production loss due to ill health and work-environment problems.                                                                | Validation studies and cohort study, survey       | Local work places                                              | [12-16]                           |
| What incentives influence employers to engage in workplace health interventions                                                           | Cohort study, Interviews                          | Local medium to large companies                                | [17]                              |
| Preferences for physical activity when suffering from LBP                                                                                 | Discrete choice design                            | OH-services on different locations                             | [18,19]                           |
| Promoting EBP in OSH                                                                                                                      | Cohort study, Survey, interviews                  | The Swedish association for occupational health                | [20,21]                           |
| Work environment and research productivity                                                                                                | Cohort study, Survey and register                 | A medical university in Sweden                                 | [22]                              |
| Economic Evaluation of Occupational Safety and Health Interventions From the Employer Perspective                                         | Systematic review                                 |                                                                | [23]                              |
| Interventions for common mental disorders in the occupational health service                                                              | Systematic review                                 |                                                                | [24]                              |
| The effectiveness of workplace nutrition and physical activity interventions in improving productivity, work performance and workability. | Systematic review                                 |                                                                | [25]                              |

1. Arapovic-Johansson, B.; Wåhlin, C.; Hagberg, J.; Kwak, L.; Björklund, C.; Jensen, I. Participatory work place intervention for stress prevention in primary health care. A randomized controlled trial. *Eur J Work Organ Psy* **2018**, 10.1080/1359432X.2018.1431883, 1-16, doi:10.1080/1359432X.2018.1431883.
2. Arapovic-Johansson, B.; Wahlin, C.; Hagberg, J.; Kwak, L.; Axen, I.; Bjorklund, C.; Jensen, I. Experience of Stress Assessed by Text Messages and Its Association with Objective Workload-A Longitudinal Study. *Int J Env Res Pub He* **2020**, 17, doi:ARTN 680 10.3390/ijerph17030680.
3. Arapovic-Johansson, B.; Wahlin, C.; Kwak, L.; Bjorklund, C.; Jensen, I. Work-related stress assessed by a text message single-item stress question. *Occup Med-Oxford* **2017**, 67, 601-608, doi:10.1093/occmed/kqx111.
4. Bergstrom, G.; Lohela-Karlsson, M.; Kwak, L.; Bodin, L.; Jensen, I.; Torgen, M.; Nybergh, L. Preventing sickness absenteeism among employees with common mental disorders or stress-related symptoms at work: Design of a cluster randomized controlled trial of a problem-solving based intervention versus care-as-usual conducted at the Occupational Health Services. *Bmc Public Health* **2017**, 17, doi:ARTN 436 10.1186/s12889-017-4329-1.
5. Keus van de Poll, M.; Nybergh, L.; Lornudd, C.; Hagberg, J.; Bodin, L.; Kwak, L.; Jensen, I.; Lohela-Karlsson, M.; Torgén, M.; Bergström, G. Preventing sickness absence among employees with common mental disorders or stress-related symptoms at work: a cluster randomised controlled trial of a problem-solving-based intervention conducted by the Occupational Health Services. *Occup Environ Med* **2020**, 0, 1-8, doi:<http://dx.doi.org/10.1136/oemed-2019-106353>.
6. Kwak, L.; Lornudd, C.; Bjorklund, C.; Bergstrom, G.; Nybergh, L.; Elinder, L.S.; Stigmar, K.; Wahlin, C.; Jensen, I. Implementation of the Swedish Guideline for Prevention of Mental ill-health at the Workplace: study protocol of a cluster randomized controlled trial, using multifaceted implementation strategies in schools. *Bmc Public Health* **2019**, 19, doi:ARTN 1668 10.1186/s12889-019-7976-6.
7. Bostrom, M.; Bjorklund, C.; Bergstrom, G.; Nybergh, L.; Elinder, L.S.; Stigmar, K.; Wahlin, C.; Jensen, I.; Kwak, L. Health and Work Environment among Female and Male Swedish Elementary School Teachers- A Cross-Sectional Study. *Int J Env Res Pub He* **2020**, 17, doi:ARTN 227 10.3390/ijerph17010227.
8. Bjorklund, C.; Hellman, T.; Jensen, I.; Akerblom, C.; Bramberg, E.B. Workplace Bullying as Experienced by Managers and How They Cope: A Qualitative Study of Swedish Managers. *Int J Env Res Pub He* **2019**, 16, doi:ARTN 4693 10.3390/ijerph16234693.
9. Bjorklund, C.; Vaez, M.; Jensen, I. Early work-environmental indicators of bullying in an academic setting: a longitudinal study of staff in a medical university. *Stud High Educ* **2020**, 10.1080/03075079.2020.1729114, doi:10.1080/03075079.2020.1729114.
10. Aboagye, E.; Karlsson, M.L.; Hagberg, J.; Jensen, I. Cost-effectiveness of early interventions for non-specific low back pain: a randomized controlled study investigating medical yoga, exercise therapy and self-care advice. *J Rehabil Med* **2015**, 47, 167-173, oi:10.2340/16501977-1910.
11. Bramberg, E.B.; Bergstrom, G.; Jensen, I.; Hagberg, J.; Kwak, L. Effects of yoga, strength training and advice on back pain: a randomized controlled trial. *Bmc Musculoskel Dis* **2017**, 18, doi:ARTN 132 10.1186/s12891-017-1497-1.
12. Lohela Karlsson, M.; Busch, H.; Aboagye, E.; Jensen, I. Validation of a measure of health-related production loss: construct validity and responsiveness - a cohort study. *BMC Public Health* **2015**, 15, 1148, doi:10.1186/s12889-015-2449-z.
13. Aboagye, E.; Jensen, I.; Bergstrom, G.; Hagberg, J.; Axen, I.; Lohela-Karlsson, M. Validity and test-retest reliability of an at-work production loss instrument. *Occup Med (Lond)* **2016**, 10.1093/occmed/kqw021, doi:10.1093/occmed/kqw021.
14. Stromberg, C.; Aboagye, E.; Hagberg, J.; Bergstrom, G.; Lohela-Karlsson, M. Estimating the Effect and Economic Impact of Absenteeism, Presenteeism, and Work Environment-Related Problems on Reductions in Productivity from a Managerial Perspective. *Value Health* **2017**, 20, 1058-1064, doi:10.1016/j.jval.2017.05.008.
15. Karlsson, M.L.; Bergstrom, G.; Bjorklund, C.; Hagberg, J.; Jensen, I. Measuring Production Loss due to Health and Work Environment Problems Construct Validity and Implications. *Journal of Occupational and Environmental Medicine* **2013**, 55, 1475-1483, doi:10.1097/Jom.0000000000000005.

16. Karlsson, M.L.; Busch, H.; Aboagye, E.; Jensen, I. Validation of a measure of health-related production loss: construct validity and responsiveness - a cohort study. *Bmc Public Health* **2015**, *15*, doi:ARTN 1148 10.1186/s12889-015-2449-z.
17. Martinsson, C.; Lohela-Karlsson, M.; Kwak, L.; Bergstrom, G.; Hellman, T. What incentives influence employers to engage in workplace health interventions? *Bmc Public Health* **2016**, *16*, doi:ARTN 854 10.1186/s12889-016-3534-7.
18. Aboagye, E.; Hagberg, J.; Axen, I.; Kwak, L.; Lohela-Karlsson, M.; Skillgate, E.; Dahlgren, G.; Jensen, I. Individual preferences for physical exercise as secondary prevention for non-specific low back pain: A discrete choice experiment. *Plos One* **2017**, *12*, doi:ARTN e0187709 10.1371/journal.pone.0187709.
19. Aboagye, E. Valuing Individuals' Preferences and Health Choices of Physical Exercise. *Pain Ther* **2017**, *6*, 85-91, doi:10.1007/s40122-017-0067-4.
20. Bramberg, E.B.; Nyman, T.; Kwak, L.; Alipour, A.; Bergstrom, G.; Elinder, L.S.; Hermansson, U.; Jensen, I. Development of evidence-based practice in occupational health services in Sweden: a 3-year follow-up of attitudes, barriers and facilitators. *Int Arch Occ Env Hea* **2017**, *90*, 335-348, doi:10.1007/s00420-017-1200-8.
21. Kwak, L.; Wahlin, C.; Stigmar, K.; Jensen, I. Developing a practice guideline for the occupational health services by using a community of practice approach: a process evaluation of the development process. *BMC Public Health* **2017**, *17*, 89, doi:10.1186/s12889-016-4010-0.
22. Jensen, I.; Bjorklund, C.; Hagberg, J.; Aboagye, E.; Bodin, L. An overlooked key to excellence in research: a longitudinal cohort study on the association between the psycho-social work environment and research performance. *Stud High Educ* **2020**, 10.1080/03075079.2020.1744127, doi:10.1080/03075079.2020.1744127.
23. Grimani, A.; Bergstrom, G.; Casallas, M.I.R.; Aboagye, E.; Jensen, I.; Lohela-Karlsson, M. Economic Evaluation of Occupational Safety and Health Interventions From the Employer Perspective A Systematic Review. *Journal of Occupational and Environmental Medicine* **2018**, *60*, 147-166, doi:10.1097/Jom.0000000000001224.
24. Axen, I.; Bramberg, E.B.; Vaez, M.; Lundin, A.; Bergstrom, G. Interventions for common mental disorders in the occupational health service: a systematic review with a narrative synthesis. *Int Arch Occ Env Hea* **2020**, 10.1007/s00420-020-01535-4, doi:10.1007/s00420-020-01535-4.
25. Grimani, A.; Aboagye, E.; Kwak, L. The effectiveness of workplace nutrition and physical activity interventions in improving productivity, work performance and workability: a systematic review. *Bmc Public Health* **2019**, *19*, doi:ARTN 1676 10.1186/s12889-019-8033-1.
